# Supplementary material for: Two-step thermal annealing improves the morphology of spin-coated films for highly efficient perovskite hybrid photovoltaics
Source: Royal Society of Chemistry journal article supplement (doi:10.1039/c4nr02751e), 2014-01-01
Supplement: c4nr02751e1.pdf [file c4nr02751e1.pdf]

## **Two-Step Thermal Annealing Improves the Morphology of Spin-Coated Films for Highly Efficient Perovskite Hybrid Photovoltaics**

Hsiang-Lin Hsu<sup>a</sup>, Chih-Ping Chen<sup>ab\*</sup>, Jia-Yaw Chang<sup>c</sup>, Yang-Yen Yu<sup>a,b</sup> and Yu-Kai Shen<sup>a</sup>

<sup>a</sup> Department of Materials Engineering, Ming Chi University of Technology, 84 Gunjuan Road, Taishan, New Taipei City, 243, Taiwan

E-mail: cpchen@mail.mcut.edu.tw

<sup>b</sup> Battery Research center of Green Energy, Ming Chi University of Technology, 84 Gunjuan Road, Taishan, New Taipei City, 243, Taiwan

<sup>c</sup> Department of Chemical Engineering, National Taiwan University of Science and Technology, 43, Section 4, Keelung Road, Taipei 10607, Taiwan

Table S1. PV parameters of perovskite devices prepared using various fabrication

| devices                   | $J_{sc}$ (mA cm <sup>-2</sup> ) | $V_{oc}$ (V) | FF(%) | PCE (%)   |
|---------------------------|---------------------------------|--------------|-------|-----------|
| 70°C (30min)              | N.A.                            | N.A.         | N.A.  | N.A.      |
| 70°C (30min) <sup>a</sup> | 9.0                             | 0.96         | 72.1  | 6.2 (5.9) |
| 80°C (30min)              | 15.7                            | 0.67         | 48.4  | 5.1(4.7)  |
| 80°C (30min) <sup>b</sup> | 14.6                            | 0.84         | 54.2  | 6.7(6.3)  |

<sup>a</sup> Devices annealed at 70 °C for 30 min and then at 100 °C for 2 min. <sup>b</sup> annealed at 80 °C for 30 min and then at 100 °C for 2 min.

Table S2 Photovoltaic parameters of perovskite devices (20 wt%–derived device that had been subjected to a two-step annealing process) after storage for various periods of time in a N<sub>2</sub>-filled glove box

| devices  | $J_{sc}$ (mA cm <sup>-2</sup> ) | $V_{oc}$ (V) | FF(%) | PCE (%)  |
|----------|---------------------------------|--------------|-------|----------|
| pristine | 14.3                            | 0.86         | 60.9  | 7.5(7.3) |
| 168 h    | 14.1                            | 0.85         | 61.2  | 7.3(7.2) |
| 336 h    | 14.7                            | 0.87         | 61.4  | 7.9(7.5) |
| 504h     | 14.5                            | 0.88         | 62.1  | 7.9(7.8) |
| 672h     | 14.5                            | 0.87         | 65.4  | 8.3(7.7) |
| 840h     | 14.6                            | 0.90         | 63.9  | 8.4(8.2) |
| 1008h    | 14.7                            | 0.90         | 64.9  | 8.6(8.2) |
| 1176h    | 14.3                            | 0.90         | 68.0  | 8.8(8.5) |
| 1344h    | 14.7                            | 0.91         | 67.9  | 9.1(8.6) |

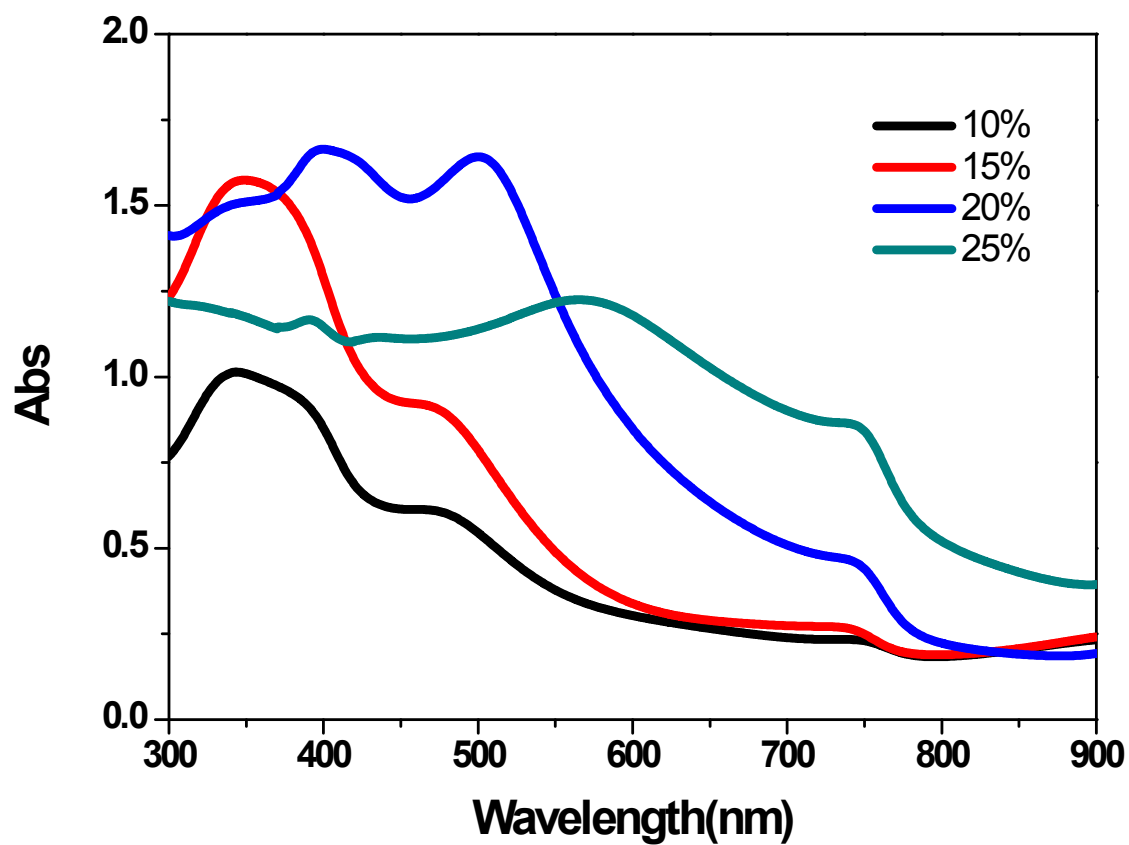

Figure S1. UV-Vis spectra of perovskite films obtained from various precursor concentrations, after annealing at 100 °C for 5 min.

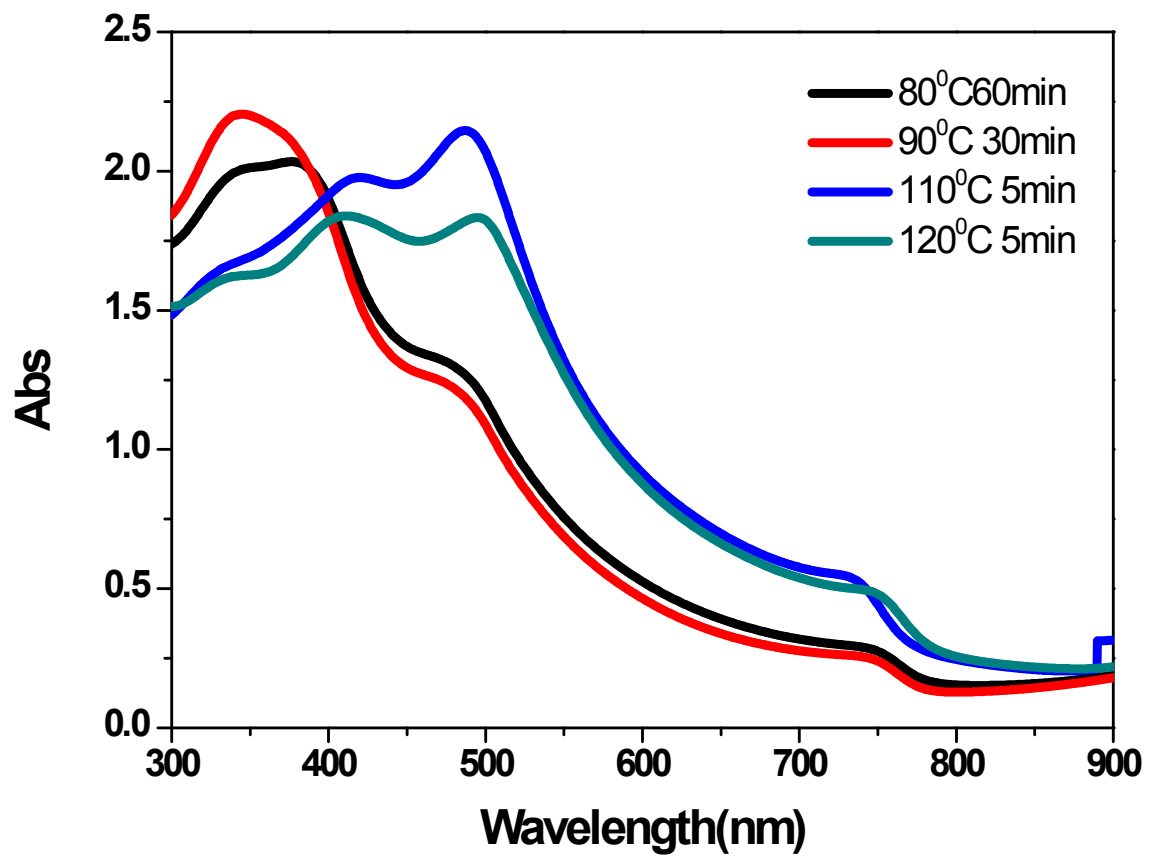

Figure S2. UV-Vis spectra of perovskite films obtained from the 20 wt% precursor concentration, after at annealing under various conditions.

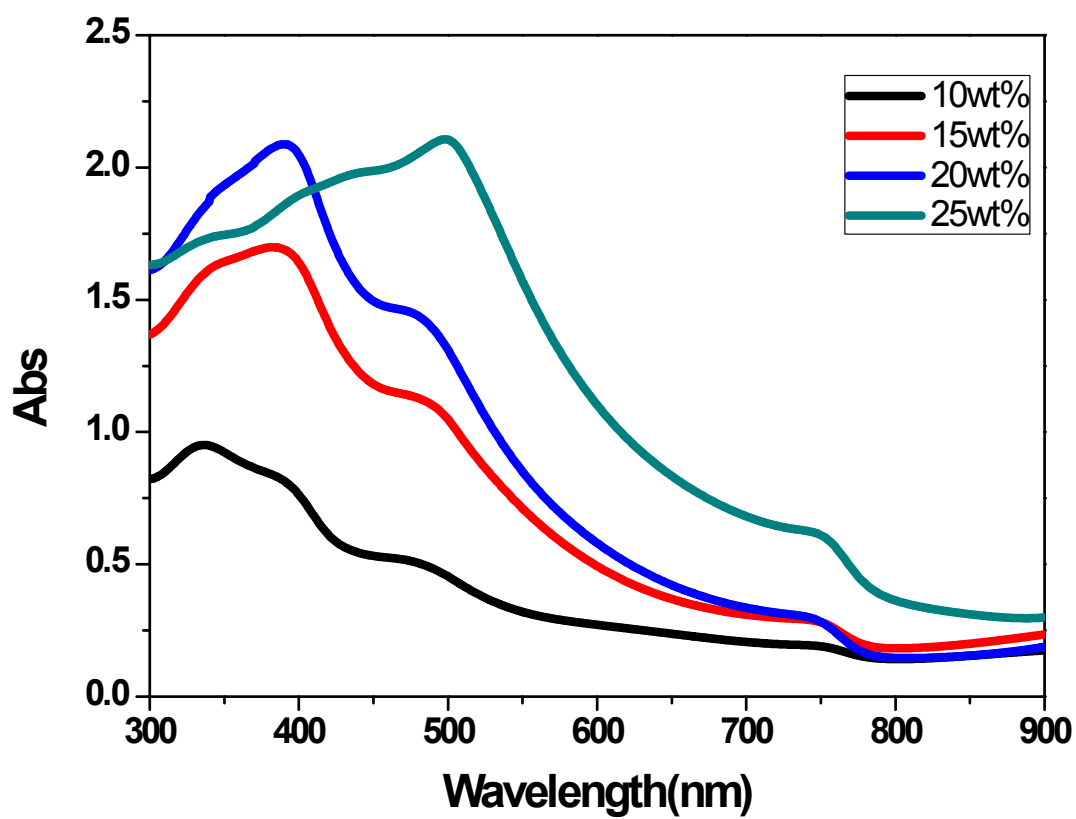

Figure S3. UV-Vis spectra of perovskite films obtained from various precursor concentrations, after two-step annealing.

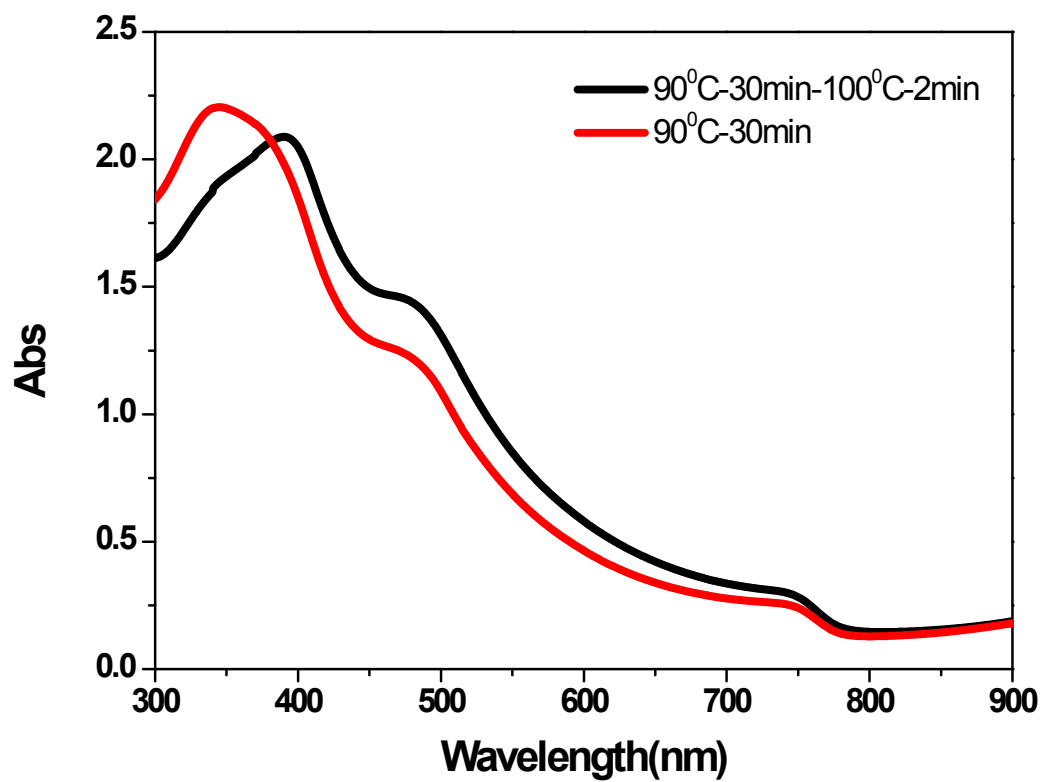

Figure S4. UV-Vis spectra of the perovskite films of 90 °C for 30 min and the film that had been subjected to a two-step annealing process.
